# Supplementary material for: Detectability of Arctic methane sources at six sites performing continuous atmospheric measurements
Source: Copernicus journal article supplement (doi:10.5194/acp-17-8371-2017), 2017-07-11
Supplement: Supplementary file 1 [file acp-17-8371-2017-supplement.pdf]

Supplement of Atmos. Chem. Phys., 17, 8371–8394, 2017  
<https://doi.org/10.5194/acp-17-8371-2017-supplement>  
© Author(s) 2017. This work is distributed under  
the Creative Commons Attribution 3.0 License.

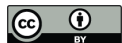

*Supplement of*

## **Detectability of Arctic methane sources at six sites performing continuous atmospheric measurements**

**Thibaud Thonat et al.**

*Correspondence to:* Thibaud Thonat ([thibaud.thonat@lsce.ipsl.fr](mailto:thibaud.thonat@lsce.ipsl.fr))

The copyright of individual parts of the supplement might differ from the CC BY 3.0 License.

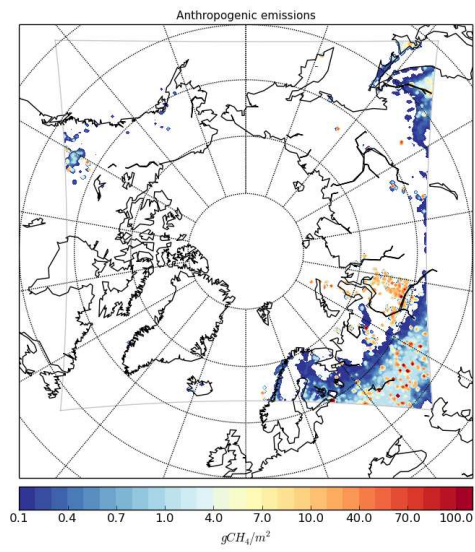

**Figure S1.** Anthropogenic emissions map. Sum over the year 2012.

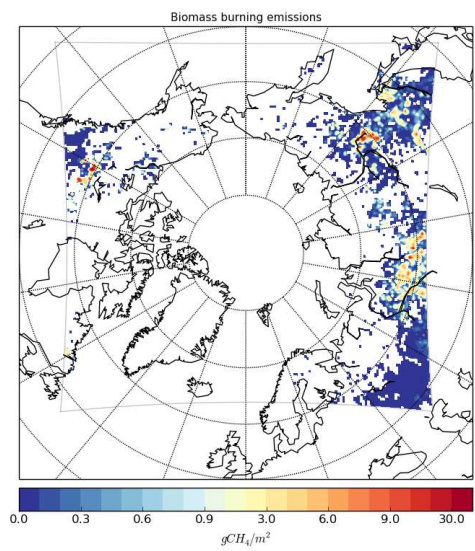

**Figure S2.** Biomass burning emissions map. Sum over the year 2012.

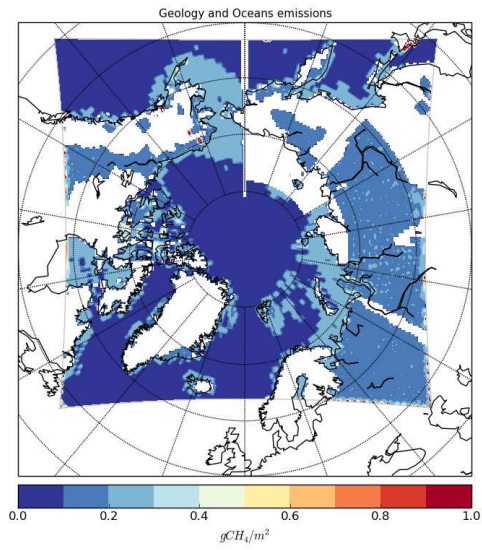

**Figure S3.** Geology and oceans emissions map. Sum over the year.

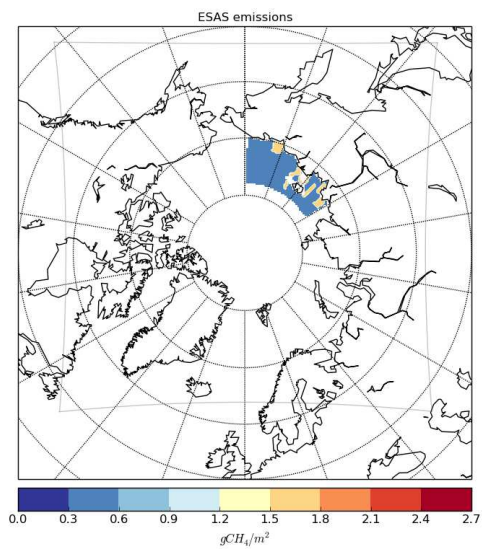

**Figure S4.** East Siberian Arctic Shelf emissions map. Sum over the year.

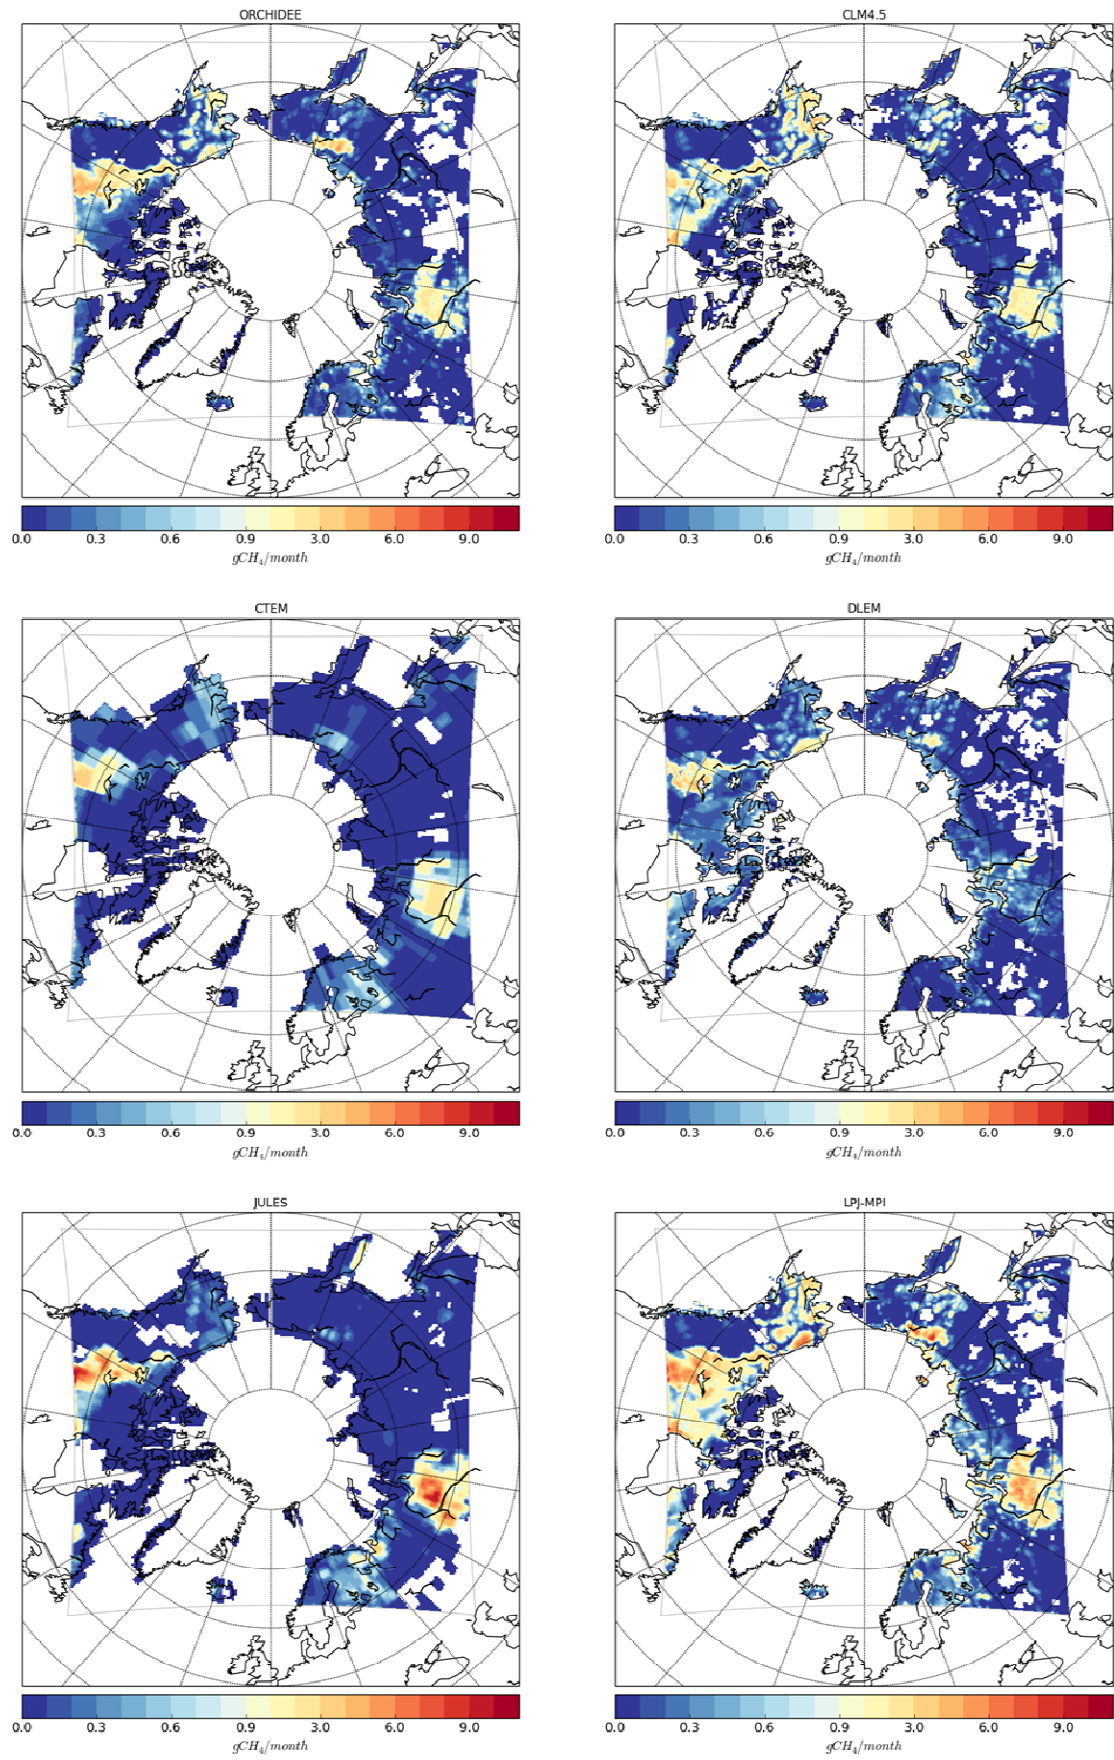

**Figure S5.** Wetland emission maps from 6 wetland models used in Poulter et al. (submitted). Average over June-October 2012.



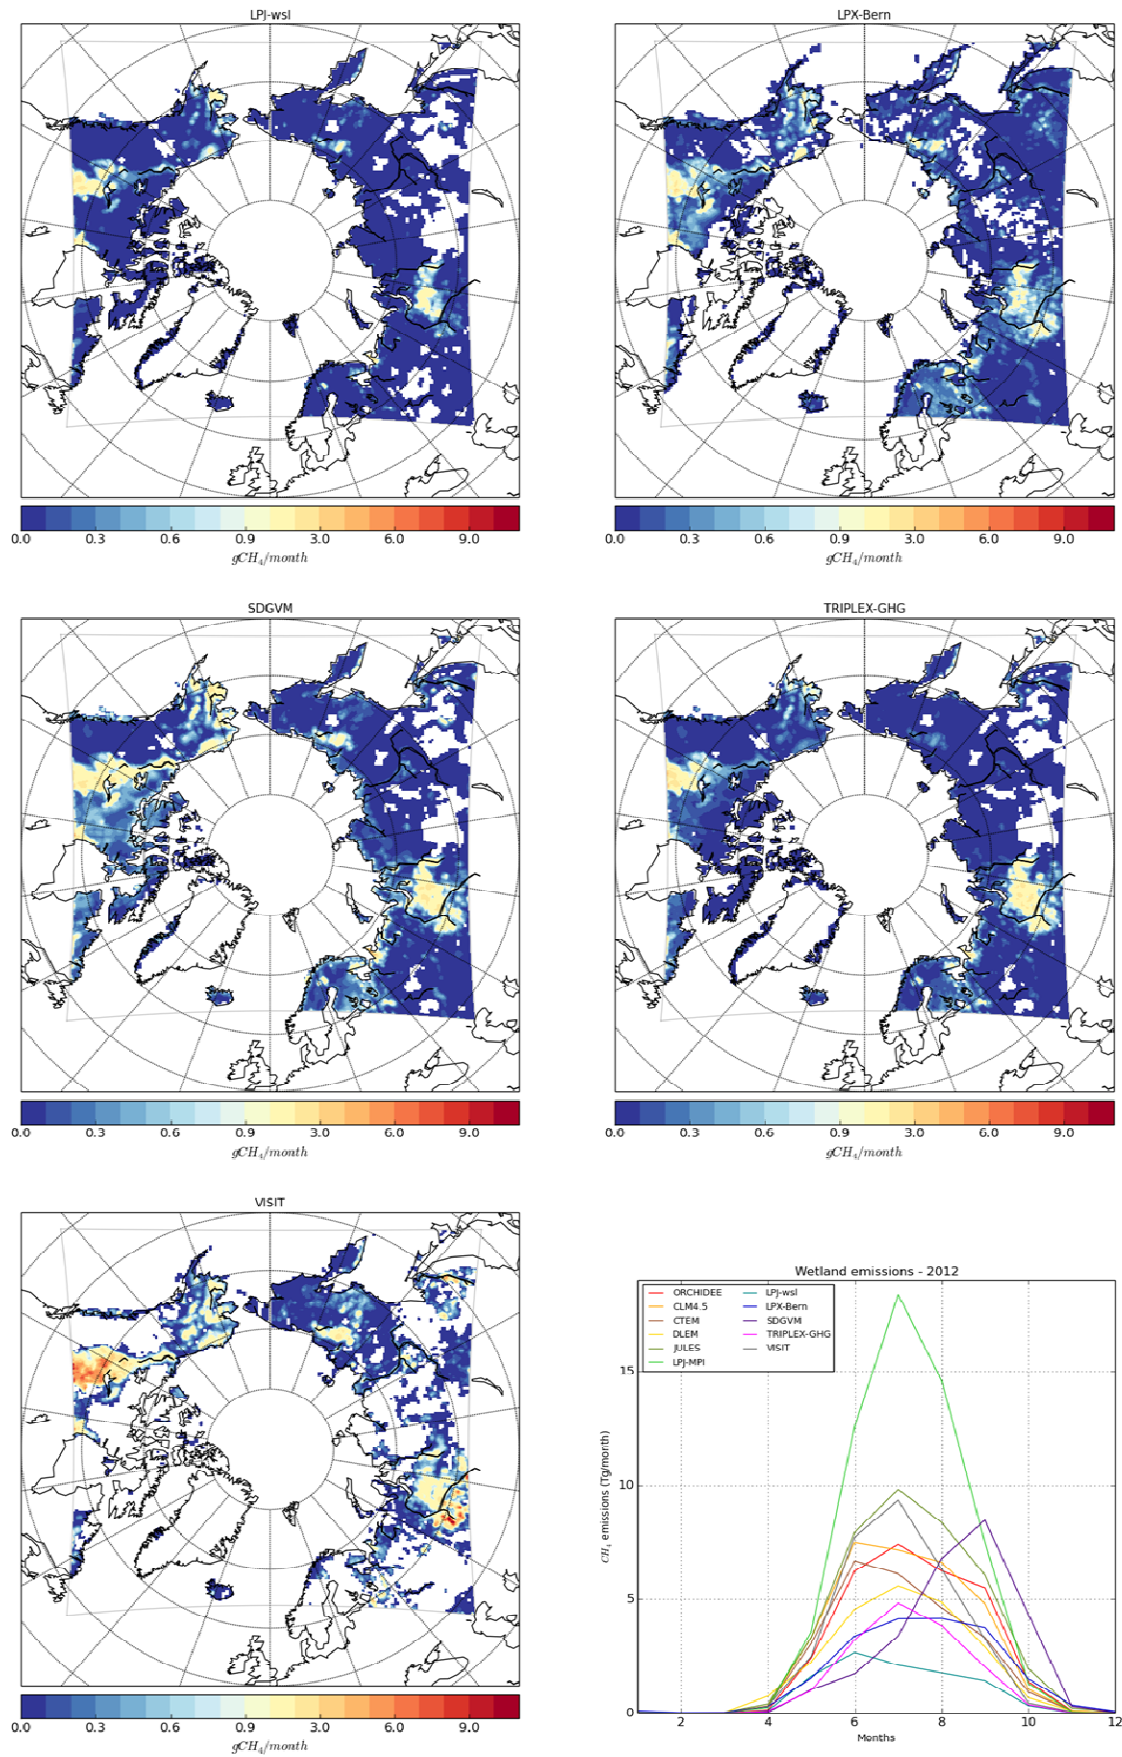

**Figure S6.** Wetland emission maps from 5 wetland models used in Poulter et al. (submitted). Average over June-October 2012. Also represented is the seasonal cycle of the emissions from the 11 models in the studied domain.

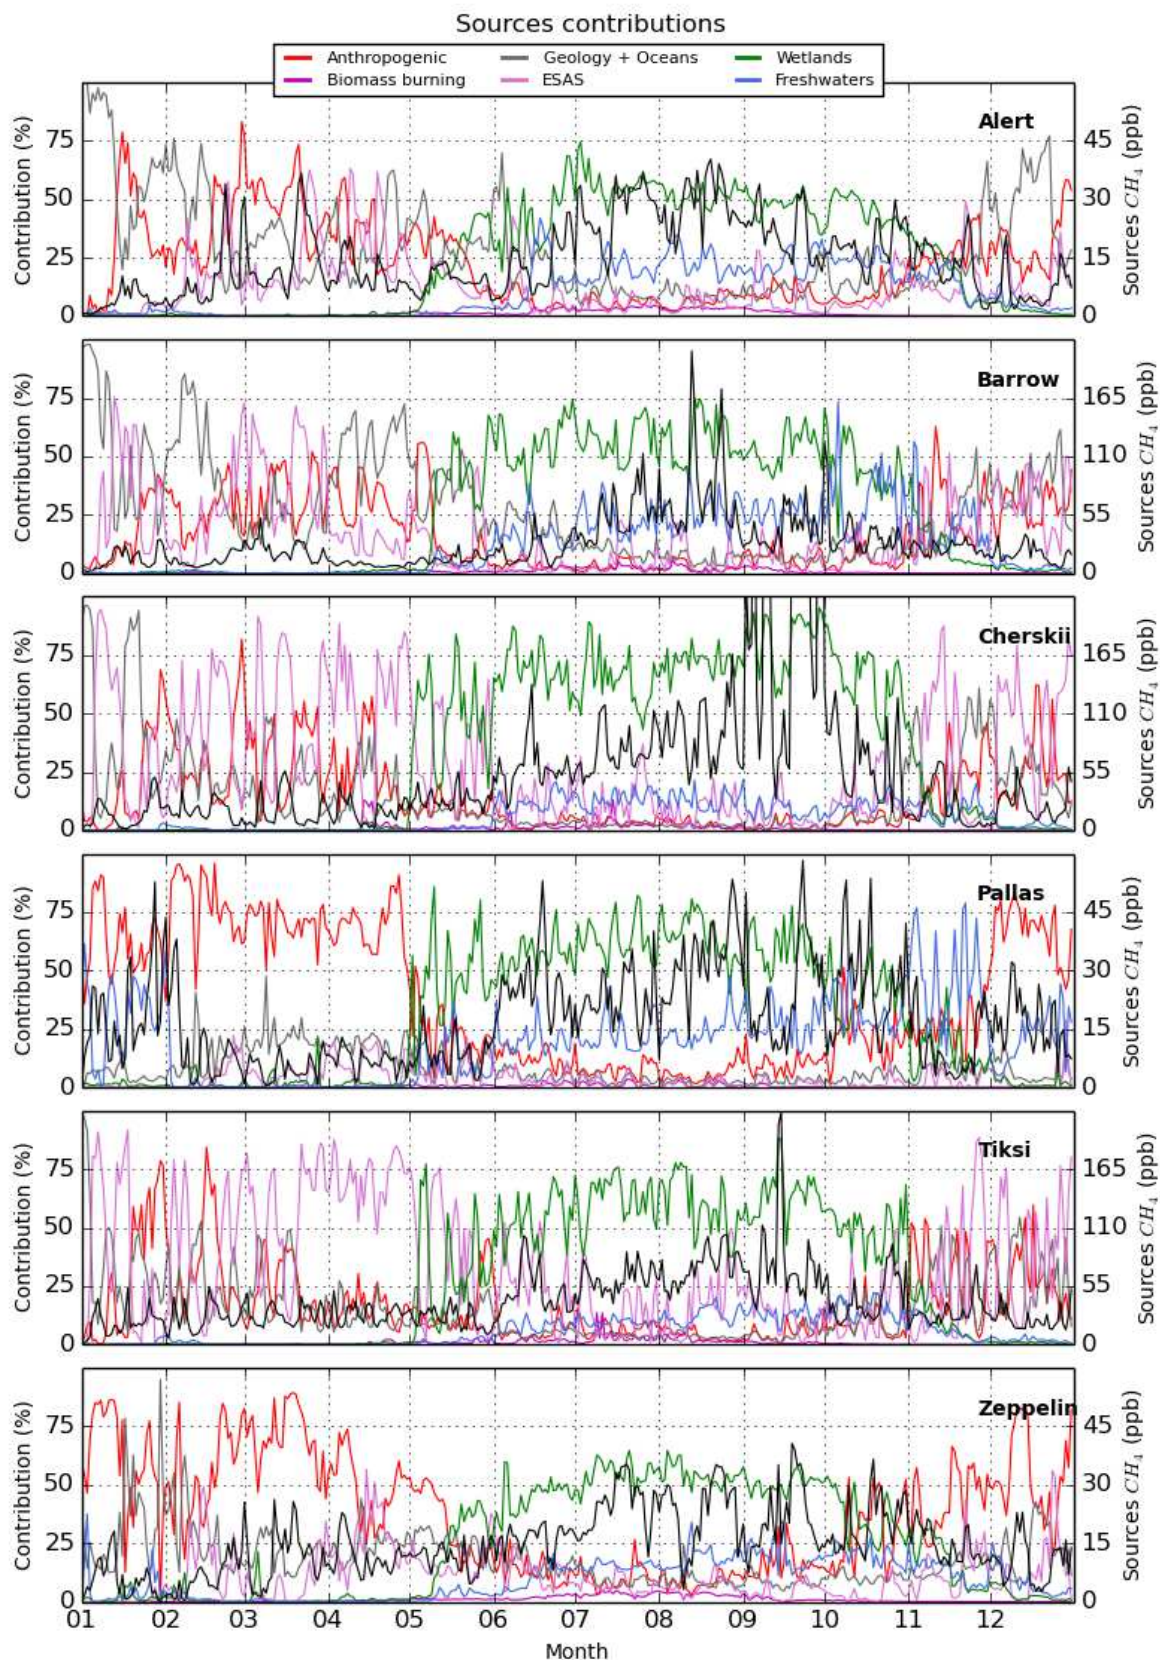

**Figure S7.** Sources contributions (in %, left-hand axis) to the  $\text{CH}_4$  abundance (excluding  $\text{CH}_4$  resulting from the boundary conditions) simulated by CHIMERE, at six measurement sites, in 2012. Red: anthropogenic emissions. Magenta: biomass burning. Grey: geology and oceans. Pink: ESAS. Green: wetlands. Blue: freshwaters. The black line represents the  $\text{CH}_4$  mixing ratio resulting from all the sources emitted in the domain (in ppb, right-hand axis). Maximum contribution for Cherskii  $\text{CH}_4$  exceeds the chosen scale and reaches 1021 ppb.



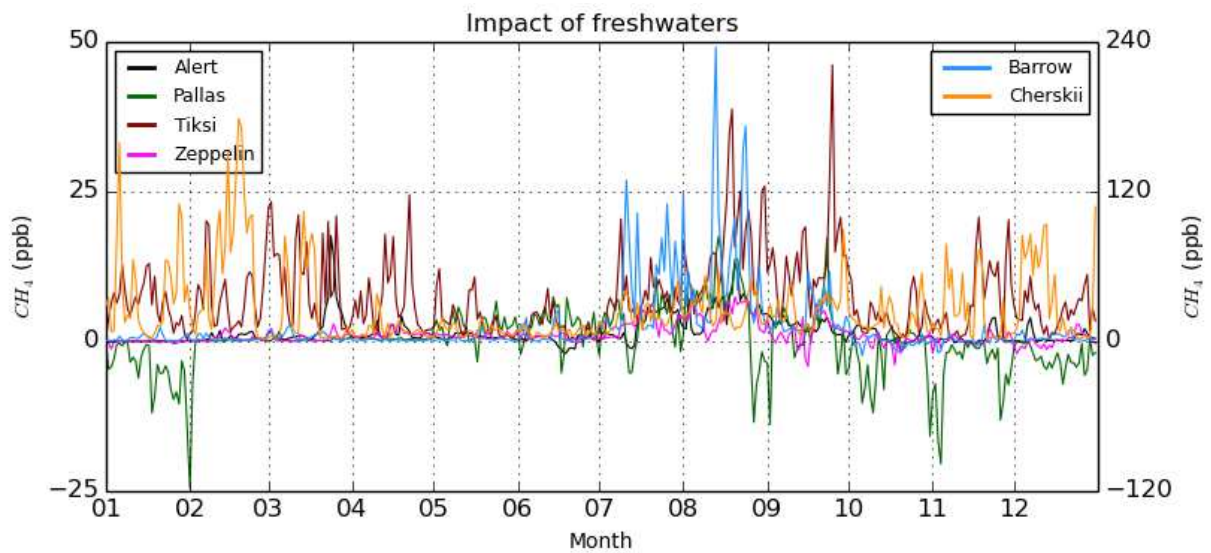

**Figure S8.** Difference between the simulation using the bLake4Me lake emission inventory and the reference simulation, at six measurement sites, in 2012. Barrow and Cherskii plots refer to the right-hand axis.

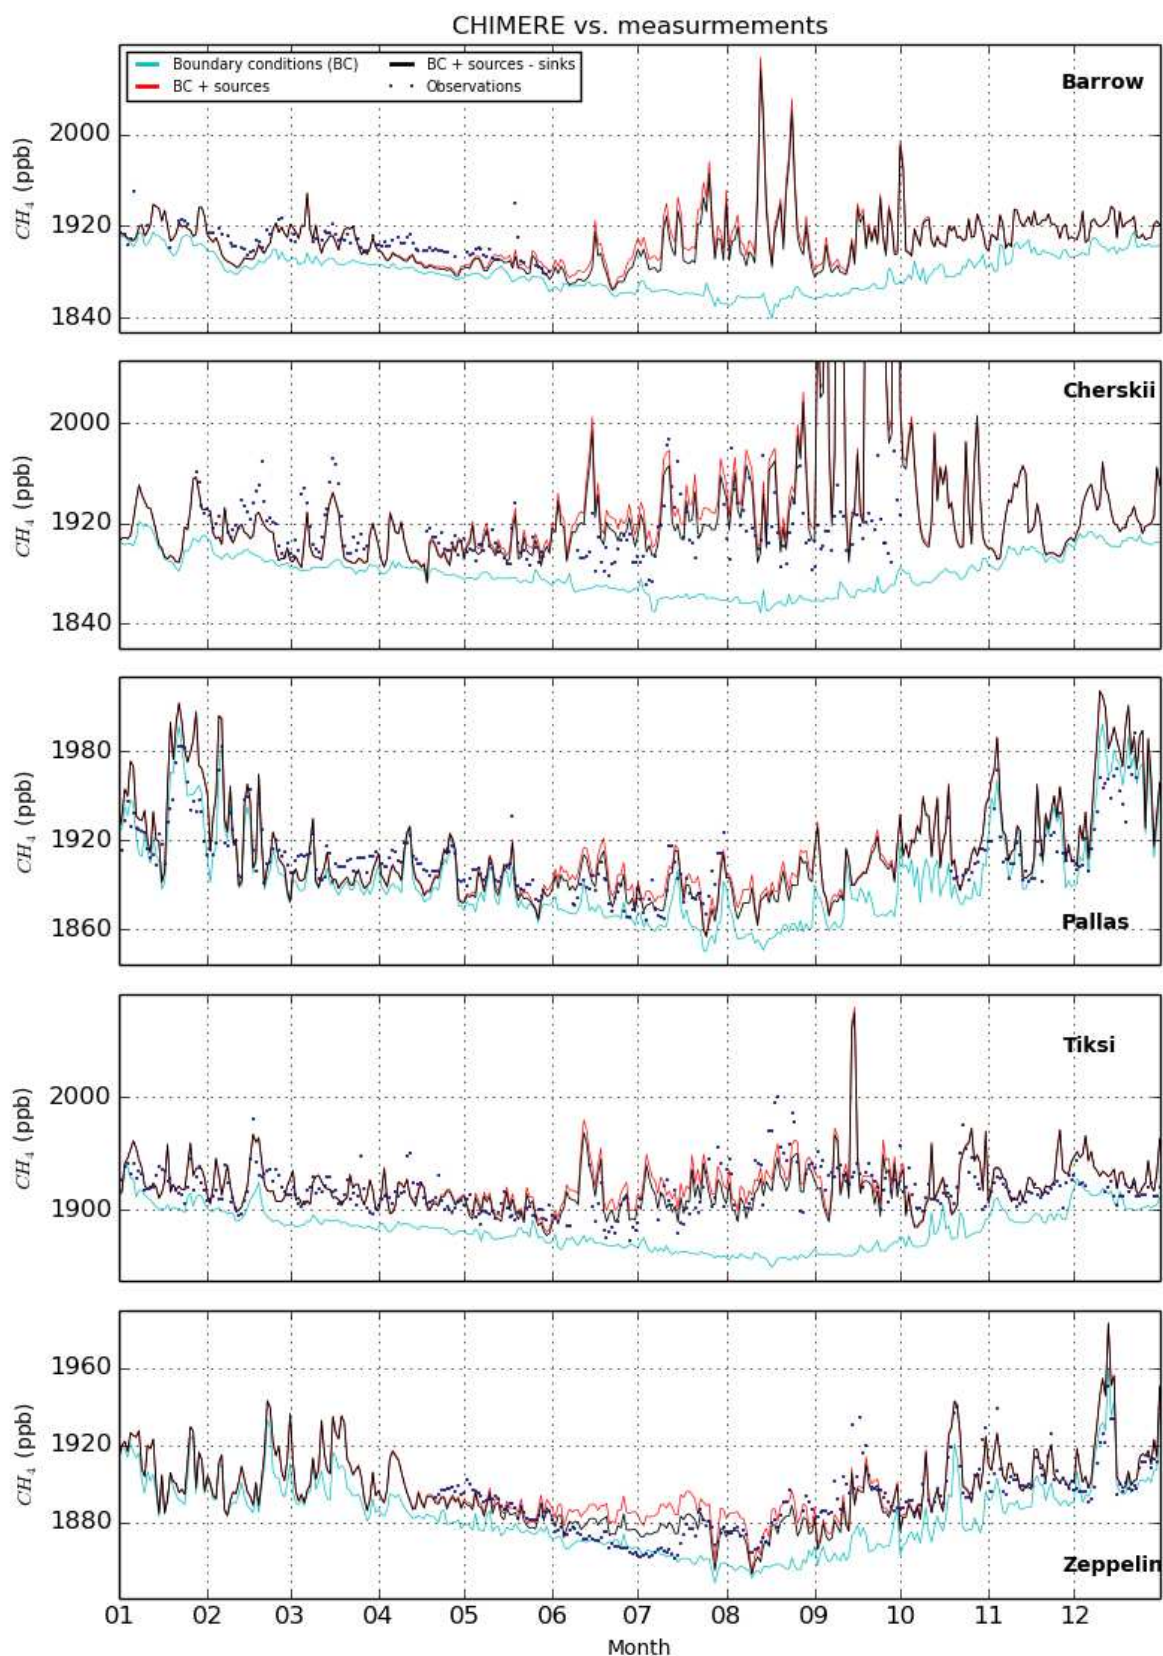

**Figure S9.** Time series of simulated and observed methane mixing ratios, at Barrow, Cherskii, Pallas, Tiksi and Zeppelin, in 2012. The cyan line represents the contribution of the boundary conditions; the red line represents the added direct contribution of the sources emitting in the domain; the black line includes the three added sinks (OH, soil, Cl). The blue points represent the observations. Time resolution for simulations and observations is 1 day.
